# Supplementary material
Source: Springer Nature journal article supplement (https://www.springermedizin.de/resource/supplementary/12984_2012_504_MOESM5_ESM.pdf/9604740)

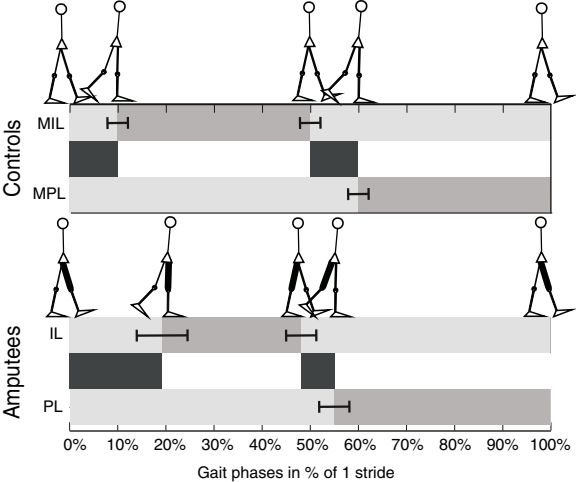

Stance phase

Swing phase

Double support phase

Supplement: MOESM5 [file 9604740]
